# Supplementary material
Source: Research Square preprint supplement (doi:10.21203/rs.3.rs-9210569/v1)
Supplement: Supplementary file 1 [file ebc3ff59fc850ffe35d0d2fa.doc]

**Table S1**. Source of germplasm clones used in study

| No. | Name | Source |
| --- | --- | --- |
|
| 1 | AKC | Farmers fields |
| 2 | AKD | Farmers fields |
| 3 | BAMBOI 7 | Farmers fields |
| 4 | BAME 7 | Farmers fields |
| 5 | BE 203 | Benin |
| 6 | BE 204 | Benin |
| 7 | BE 575 | Benin |
| 8 | BE 627 | Benin |
| 9 | BE 739 | Benin |
| 10 | IDDM 29 | Farmers fields |
| 11 | KT 1 | Farmers fields |
| 12 | KT 2 | Farmers fields |
| 13 | KT 4 | Farmers fields |
| 14 | KT 5 | Farmers fields |
| 15 | SB 9 | Farmers fields |
| 16 | SG 004 | Recommended clones from Ghana's Cashew Breeding Program |
| 17 | SG 014 | Recommended clones from Ghana's Cashew Breeding Program |
| 18 | SG 224 | Recommended clones from Ghana's Cashew Breeding Program |
| 19 | SG 266 | Recommended clones from Ghana's Cashew Breeding Program |
| 20 | SG 273 | Recommended clones from Ghana's Cashew Breeding Program |

**Table S2.**Mean annual rainfall (mm) , maximum and minimum annual temperature (ᵒC) , relative humidity (0900hrs and 1500hrs GMT observed during critical months (Dry season) of October - March in the vegetative ( 2009 - 2011) and Reproductive (2012-2018) phases of 20 cashew germplasm clones evaluated at Bole and Wenchi.

| Location | Soil type | | Altitude | Parameters | | Vegetative phase | | Reproductive phase | | | | | | | Mean |
| --- | --- | --- | --- | --- | --- | --- | --- | --- | --- | --- | --- | --- | --- | --- | --- |
| **Bole** | **Ferric Luvisol** | **297 m.a.s.l** | Year | | 2009 | 2010 | 2011 | 2012 | 2013 | 2014 | 2015 | 2016 | 2017 | 2018 |  |
| Rainfall (mm/yr) | | 32.7 | 47.3 | 27.3 | 52.35 | 49.85 | 37.2 | 34.55 | 45.05 | 43 | 46.45 | **41.6** |
| Max. Temperature (ᵒC) | | 34.1 | 34.1 | 33.9 | 32.7 | 33 | 33.3 | 40.9 | 36.7 | 38 | 37.3 | **35.4** |
| RH (%) 0900hrs GMT | | 73.3 | 72.1 | 73.8 | 73.1 | 72 | 73.1 | 68 | 72.9 | 70 | 70.8 | **71.9** |
| RH (%) 1500hrs GMT | | 24.3 | 22.3 | 21.9 | 19.7 | 20.1 | 29.6 | 21 | 20.6 | 23.9 | 19.8 | **22.3** |
| **Wenchi** | **Lithosol** | **304 m.a.s.l** | Rainfall (mm/yr) | | 76 | 76.2 | 81.5 | 74.7 | 62.1 | 66.2 | 50 | 51.1 | 40.65 | 43 | **62.1** |
| Max. Temperature (ᵒC) | | 31.8 | 32.6 | 32.5 | 31 | 32 | 31 | 38 | 32.2 | 32.2 | 31.9 | **32.5** |
| RH (%) 0900hrs GMT | | 70.5 | 80.3 | 79.1 | 80 | 84 | 81 | 79.5 | 79.3 | 81 | 81.2 | **79.6** |
| RH (%) 1500hrs GMT | | 54.7 | 56.7 | 54.7 | 56.4 | 57.4 | 59 | 57.6 | 56.3 | 55 | 56.3 | **56.4** |

Key : RH - relative humidity, m.a.s.l. - meters above sea level.

**Table S3** Mean sum of squares for percent survival, plant height, canopy volume, nut yield, first 2 - year, 3 - year, 4 - year, 5 - years, 6 - years, 7 - year, nut weight and shelling of 20 cashew germplasm clones evaluated at Bole and Wenchi from 2009 - 2014.

| Source | df | Survival (%) | Height (m) | Canopy volume | 2 years | 3 years |
| --- | --- | --- | --- | --- | --- | --- |
| Block | 3 | 612.1 | 0.032* | 2150 | 2358 | 4626 |
| Clone | 19 | 1585.3*** | 0.260* | 4518** | 23594*** | 58701*** |
| Environment | 1 | 2331.7* | 6.11** | 369481*** | 673357** | 2338391*** |
| Clone × Environment | 19 | 1100.2* | 0.113* | 4420 | 5993 | 23340* |
| Error | 117 | 618.2 | 0.065 | 3167 | 6692 | 12173 |
|  |  |  |  |  |  |  |
| Source | df | 4 years | 5 years | 6 years | 7 years | Nut weight (g) |
| Block | 3 | 10205 | 56089 | 89636 | 162429 | 0.1377 |
| Clone | 19 | 44849*** | 109228*** | 156255*** | 213885*** | 0.794*** |
| Environment | 1 | 1426705*** | 3277036*** | 3508356*** | 5314660** | 54.05*** |
| Clone × Environment | 19 | 51580*** | 85063*** | 89758*** | 112692** | 1.079** |
| Error | 117 | 20193 | 27540 | 42770 | 45515 | 0.2253 |
|  |  |  |  |  |  |  |
| Source | df | Shelling (%) |  |  |  |  |
| Block | 3 | 2.26 |  |  |  |  |
| Clone | 19 | 15.54*** |  |  |  |  |
| Environment | 1 | 124.96*** |  |  |  |  |
| Clone × Environment | 19 | 10.32** |  |  |  |  |
| Error | 117 | 4.93 |  |  |  |  |

Table S 4

| Variance components | Trait | | | | | | |
| --- | --- | --- | --- | --- | --- | --- | --- |
| Survival | Height | Canopy volume | nut weight | shelling | 2-year average yield |  |
| Mean | 66.3 | 0.93 | 52.5 | 5.3 | 29.3 | 186.1 |  |
| Range | 44.3 - 84.2 | 0.52 - 1.40 | 3.6 - 121 | 4 .0 - 6.3 | 27 - 33 | 79.3 - 352.7 |  |
| Genotype variance | 20.3 | 0.017 | 12.4 | 0.056 | 1.139 | 2196.1 |  |
| Genotype x Location variance | 181 | 0.018 | 333.3 | 0.178 | 0.797 | 96.3 |  |
| Residual Variance | 610.98 | 0.607 | 3127.4 | 0.243 | 5.367 | 5713.8 |  |
| Broad sense Heritability | 0.12 | 0.51 | 0.10 | 0.11 | 0.52 | 0.74 |  |
|  | 3-year average yield | 4-year average yield | 5-year average yield | 6-year average yield | 7-year average yield |  |  |
| Mean | 264.1 | 375.7 | 498.2 | 581.5 | 631.8 |  |  |
| Range | 76 -576.9 | 215.6 - 631 | 229.6 - 900.1 | 287.1 - 961.05 | 306.8 - 1143.6 |  |  |
| Genotypic variance | 4413.0 | 4415.0 | 2679.2 | 7964.8 | 12123.8 |  |  |
| Genotype x Location variance | 3190.1 | 7294.4 | 14975.0 | 12467.7 | 17346.0 |  |  |
| Residual Variance | 10308.6 | 18800.8 | 25806.8 | 38791.4 | 41504.5 |  |  |
| Broad sense Heritability | 0.60 | 0.50 | 0.20 | 0.42 | 0.47 |  |  |

**Reference**

Adu-Gyamfi, P. K., Barnor, M., Akpertey, A., Dadzie, A. M., Anyomi, E., Osei-Akoto, S. & Padi, F. (2021). Broadening the Gene Pool of Cashew (Anacardium occidentale) for Survival and Precocity. *Agricultural Research*: 1-13.

Adu-Gyamfi, P. K., Dadzie, M. A., Barnor, M., Akpertey, A., Arthur, A., Osei-Akoto, S., Ofori, A. & Padi, F. (2019). Genetic variability and trait association studies in cashew (Anacardium occidentale L.). *Scientia horticulturae* 255: 108-114.

Dadzie, A., Adu-Gyamfi, P., Opoku, S., Yeboah, J., Akpertey, A., Opoku-Ameyaw, K., Assuah, M., Gyedu-Akoto, E. & Danquah, W. (2014). Evaluation of Potential Cashew Clones for Utilization in Ghana. *Advances in Biological Chemistry* 4: 232-239.
